# Supplementary material for: Metformin Reduces Potassium Currents and Prolongs Repolarization in Non-Diabetic Heart
Source: MDPI journal article supplement (doi:10.3390/ijms23116021), 2022-05-27
Supplement: s1 [file s1]

## SUPPLEMENTARY RESULTS

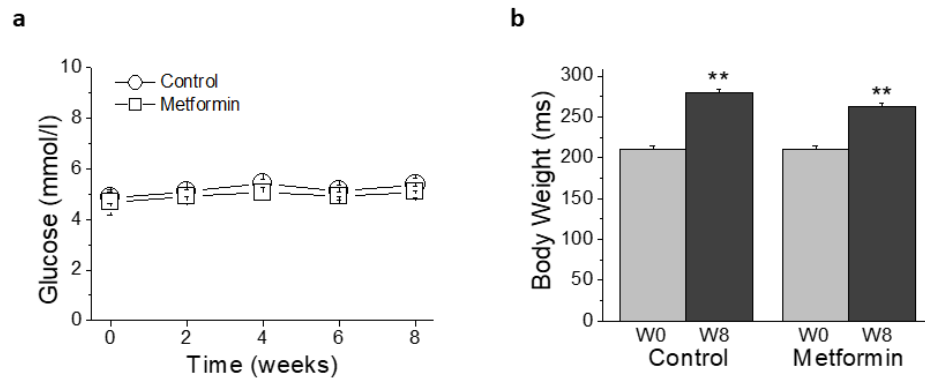

**Supplementary Figure S1.** Metformin does not cause hypoglycemia in control rats. Weekly measurements of fasting blood glucose levels (**a**) and body weight (**b**) in animals treated with vehicle or metformin 35 mg/kg\*day. Data represent mean  $\pm$  SEM,  $n = 8$ . \*\* $p < 0.01$  compared with week 0.

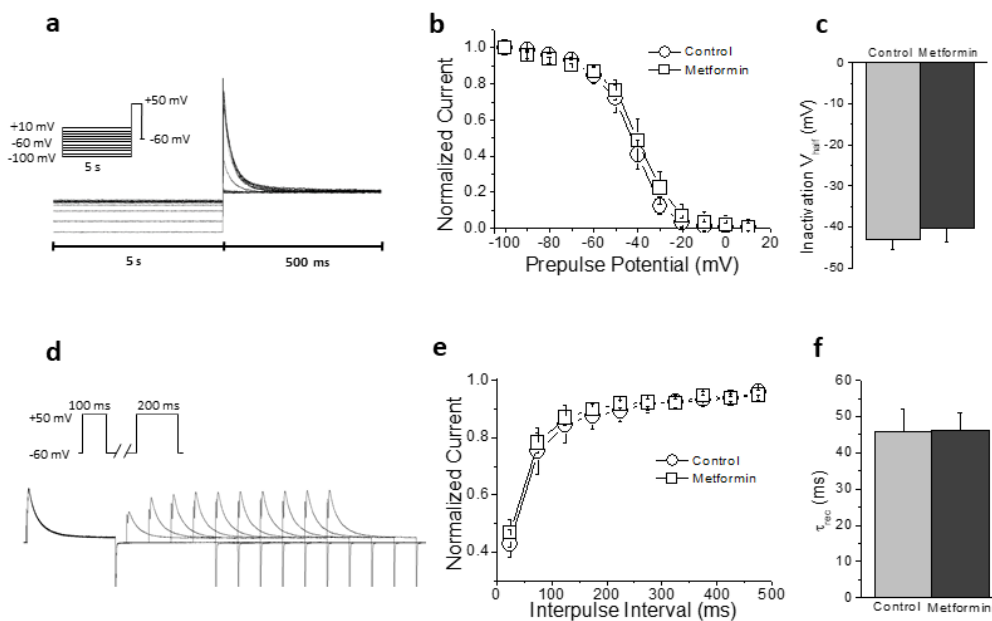

**Supplementary Figure S2.** Chronic metformin does not affect  $I_{to}$  biophysical parameters. (**a**) Representative  $I_{to}$  inactivation recording of a myocyte from an animal treated with metformin 35 mg/kg daily for 7 weeks. (**b**) Normalized current as a function of voltage and (**c**) calculated inactivation half-voltage,  $V_{half}$ . (**d**) Representative  $I_{to}$  recovery from inactivation in a cardiomyocyte from an animal treated with metformin, (**e**) current values and (**f**) calculated time constant of recovery,  $\tau_{rec}$ . Data represent mean  $\pm$  SEM.  $n = 13$  and 17 cells in the control and metformin groups, respectively. Diagrams of the recording protocols depicted.

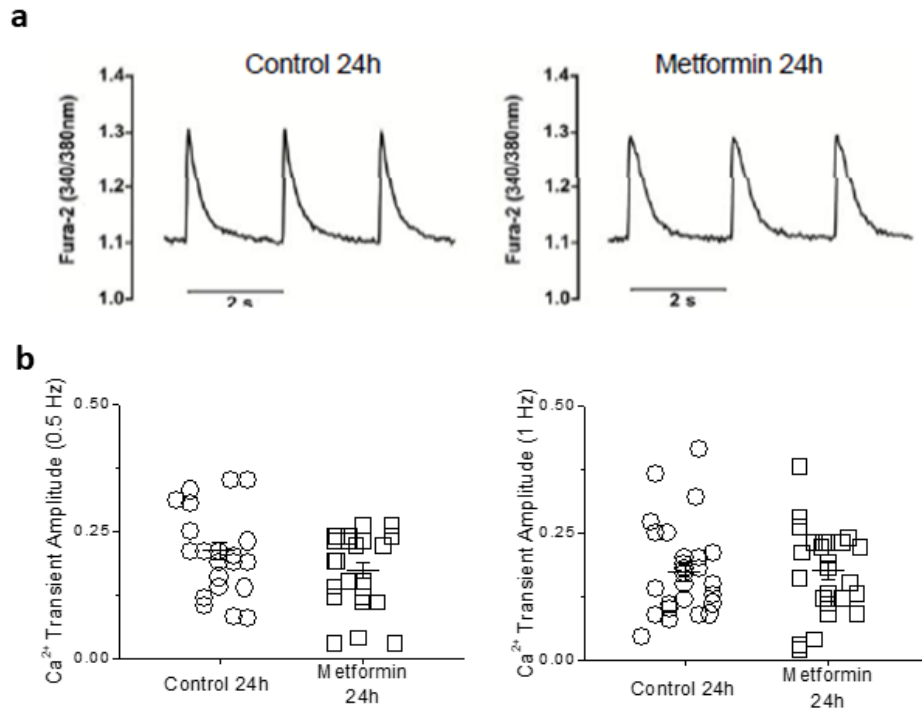

**Supplementary Figure S3.** Metformin does not affect calcium handling *in vitro*. (a) Intracellular calcium transient traces obtained in control cardiomyocytes incubated with vehicle or 10 mM metformin for 24h at a stimulation frequency of 0.5Hz. (b) Mean data at stimulation frequencies of 0.5 and 1Hz. Data represent individual data points with mean ± SEM.

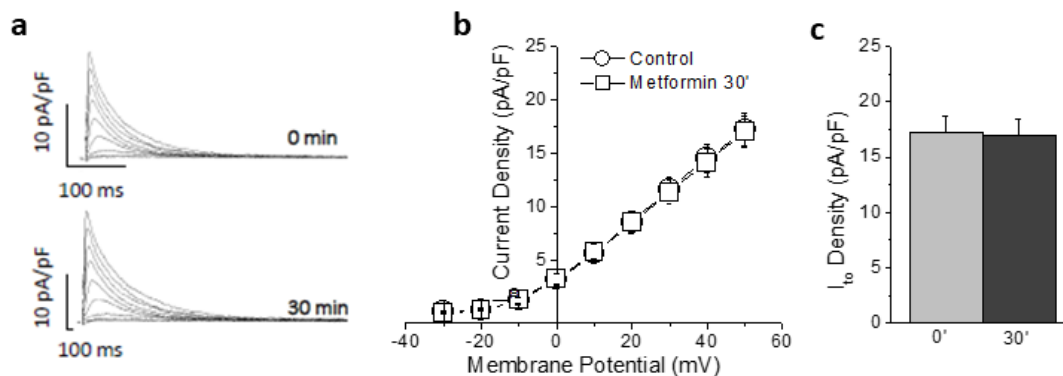

**Supplementary Figure S4.** Metformin does not directly block the I<sub>to</sub> channel. (a) Representative I<sub>to</sub> recordings from cardiomyocytes isolated from control rats and exposed to 10 mM metformin for 30 min in the recording solution. (b) Average current density–voltage relationships of I<sub>to</sub> and (c) peak values at +50 mV. Data represent mean ± SEM. n = 10 cells.

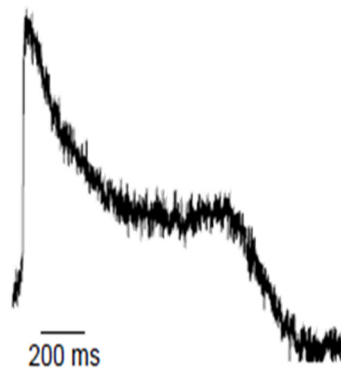

**Supplementary Figure S5.** Incubation with 3 mM metformin for 24h prolongs action potential duration sufficiently to allow depolarizing channels to recover from inactivation and generate early afterdepolarizations.

## **SUPPLEMENTARY METHODS**

### **Blood measurements**

Animals fasted overnight were anesthetized with isoflurane inhalation and blood was collected from the tail vein in heparinized capillaries. Blood glucose levels were determined using glucose test strips and a standard Accutrend Plus automatic glucometer (Roche, Basel, Switzerland).
